# Supplementary material
Source: MDPI journal article supplement (https://www.mdpi.com/2073-4344/11/10/1227)

## Supplementary Material

# Ru-gC<sub>3</sub>N<sub>4</sub> Catalyzed Hydrodebenzylation of Benzyl Protected Alcohol and Acid Groups Using Sodium Hypophosphite as a Hydrogen Source

Sourav Chakraborty \*, Ashish Bahuguna \* and Yoel Sasson

Casali Center of Applied Chemistry, Institute of Chemistry, The Hebrew University of Jerusalem, Jerusalem 9190401, Israel; ysasson@huji.ac.il

\* Correspondence: sourav.chakraborty@mail.huji.ac.il (S.C.); ashish.bahuguna@mail.huji.ac.il (A.B.); Tel.: +972-2-658-5111 (S.C.); +972-2-658-5111 (A.B.)

**Citation:** Chakraborty, S.; Bahuguna, A.; Sasson, Y. Ru-gC<sub>3</sub>N<sub>4</sub> Catalyzed Hydrodebenzylation of Benzyl Protected Alcohol and Acid Groups Using Sodium Hypophosphite as a Hydrogen Source. *Catalysts* **2021**, *11*, 1227. <https://doi.org/10.3390/catal11101227>

Academic Editor: Gilles Berhault

Received: 20 September 2021

Accepted: 8 October 2021  
Published: 12 October 2021

**Publisher's Note:** MDPI stays neutral with regard to jurisdictional claims in published maps and institutional affiliations.

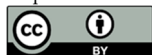

**Copyright:** © 2021 by the authors. Submitted for possible open access publication under the terms and conditions of the Creative Commons Attribution (CC BY) license (<https://creativecommons.org/licenses/by/4.0/>).

**Abstract:** A straightforward process for hydrodebenzylation of benzyl protected acid and alcohol derivatives to the corresponding acids and alcohols using sodium hypophosphite in the presence of Ru-GCN catalyst is reported. The developed Ru-GCN catalyst is cost effective compared to other noble metal-based catalysts and has been explored to exhibit excellent activity for catalytic hydrodebenzylation reactions under moderate reaction conditions. The non-corrosive sodium hypophosphite has been found as a better hydrogen donor compared to alkali metal formats in presence of Ru-GCN catalyst. The stated catalyst was characterized using several spectrometric and material characterization methods such as PXRD, IR, SEM, TEM, XPS, and TGA. The Ru-GCN catalyst corroborated good reusability and stability for multiple cycles. The catalyst preparation is facile and the developed process is simple and safe as it avoids use of high hydrogen pressure. The developed protocol can also be replicated on industrial scale on account of excellent recyclability and retained activity after multiple cycles and makes the process sustainable. Gram scale reaction was performed to verify the industrial potential of reported catalyst.

**Keywords:** heterogeneous catalyst; hydrogen transfer reaction; graphitic carbon nitride

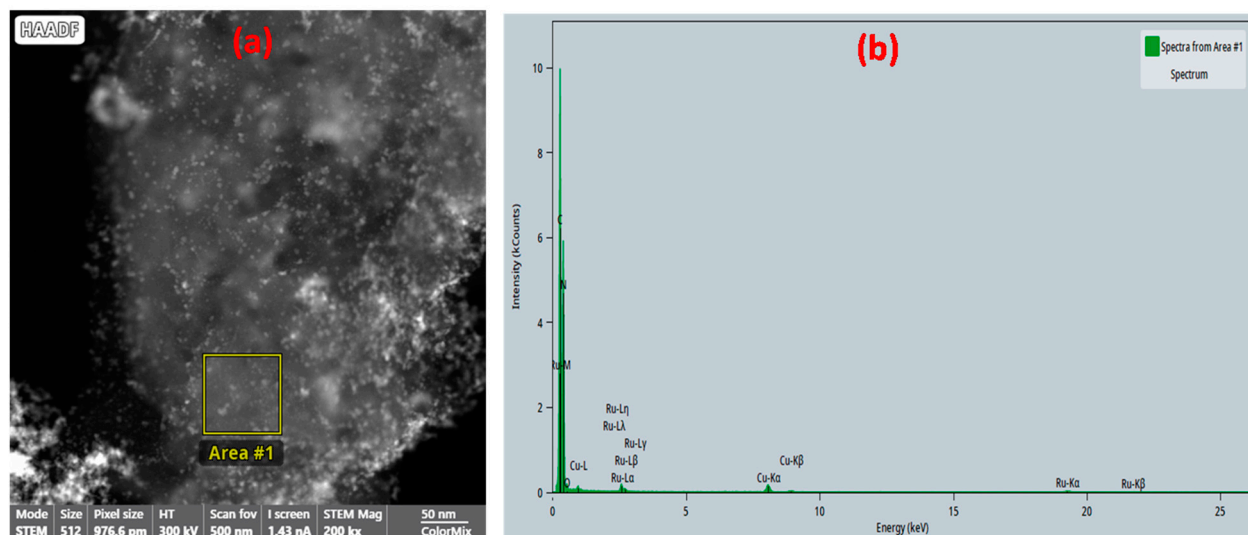

Figure S1. TEM image (a) and EDAX (b) of Ru-GCN.

Table S1. Elemental composition of Ru-GCN material.

| Element | Weight % | Atomic % | Uncert. % | Detector Correction | K Factor |
|---------|----------|----------|-----------|---------------------|----------|
| C       | 59.58    | 65.24    | 2.47      | 1.00                | 1.00     |
| N       | 36.26    | 34.05    | 4.16      | 1.00                | 0.79     |
| O       | 0.24     | 0.20     | 23.92     | 1.00                | 0.69     |
| Ru      | 3.92     | 0.51     | 1.67      | 1.00                | 6.52     |

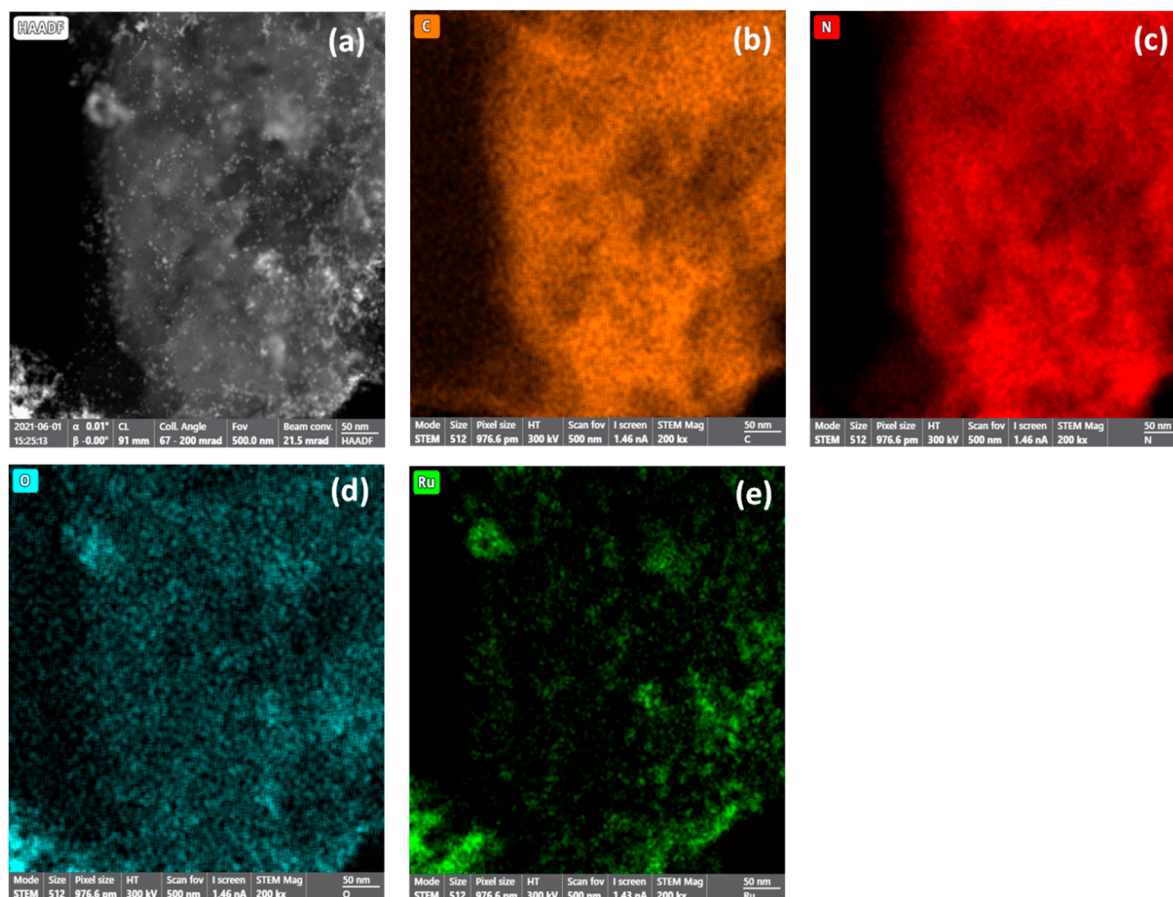

Figure S2. Elemental mapping of Ru-GCN material; (b) carbon, (c) nitrogen, (d) oxygen and (e) ruthenium.

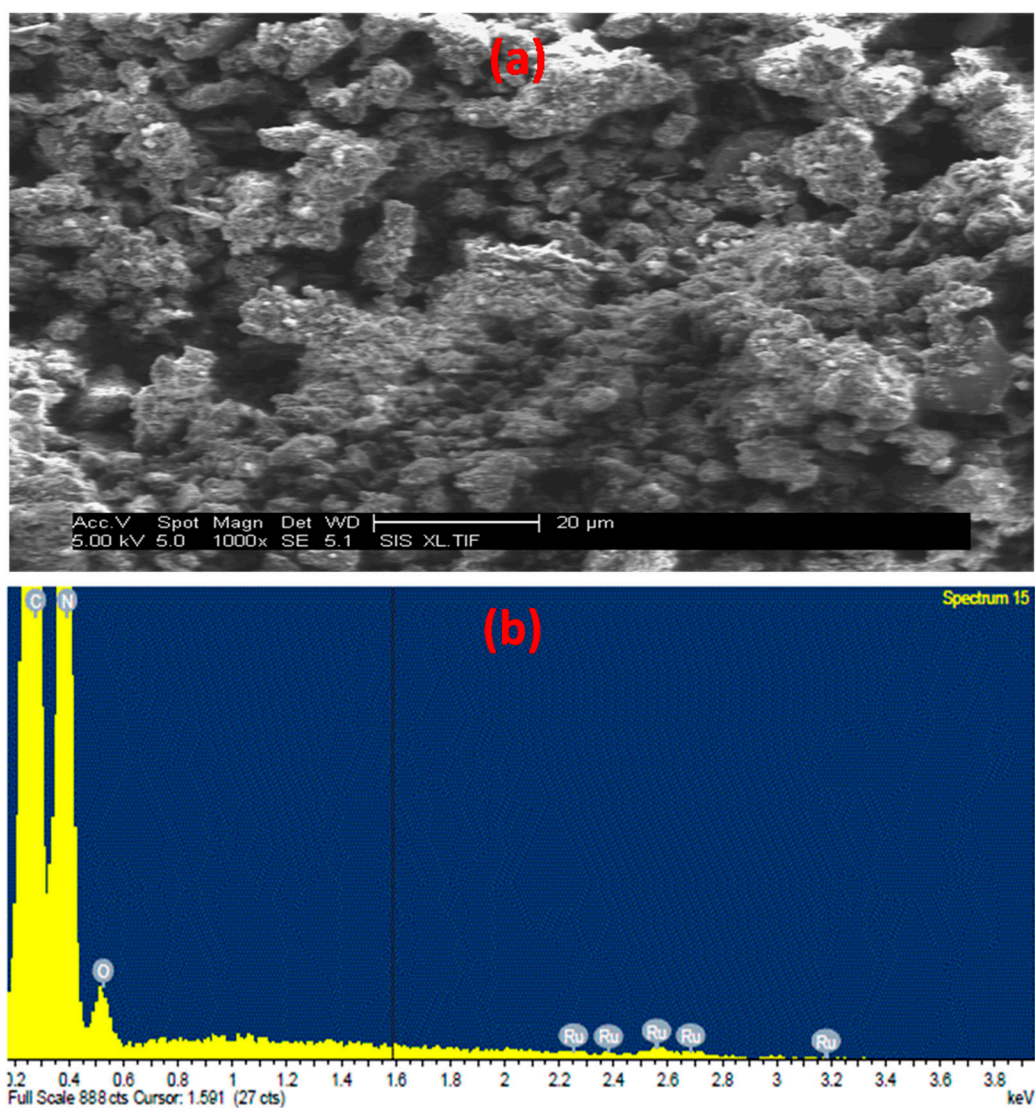

**Figure S3.** SEM image (a) elemental quantification (b) of Ru-GCN material.

**Table S2.** Elemental composition of Ru-GCN material.

| Element | APP Conc. | Intensity Corr. | Weight % | Weight %<br>Sigma | Atomic % |
|---------|-----------|-----------------|----------|-------------------|----------|
| C K     | 26.98     | 2.1379          | 32.82    | 0.83              | 36.17    |
| N K     | 16.01     | 0.6628          | 61.06    | 1.17              | 59.35    |
| O K     | 2.48      | 1.4538          | 2.27     | 0.42              | 3.68     |
| Ru L    | 1.38      | 0.5864          | 3.85     | 1.38              | 0.80     |

**Table S3.** XPS Elemental composition/Quantification of Ru-GCN.

| Element | Atomic conc. [%] | Error [%] | Mass conc. [%] | Error [%] |
|---------|------------------|-----------|----------------|-----------|
| C 1s    | 36.89            | 0.28      | 25.77          | 0.22      |
| N 1s    | 52.37            | 0.30      | 42.66          | 0.26      |
| O 1s    | 6.38             | 0.32      | 5.94           | 0.29      |
| Ru 3d   | 4.36             | 0.05      | 25.64          | 0.22      |

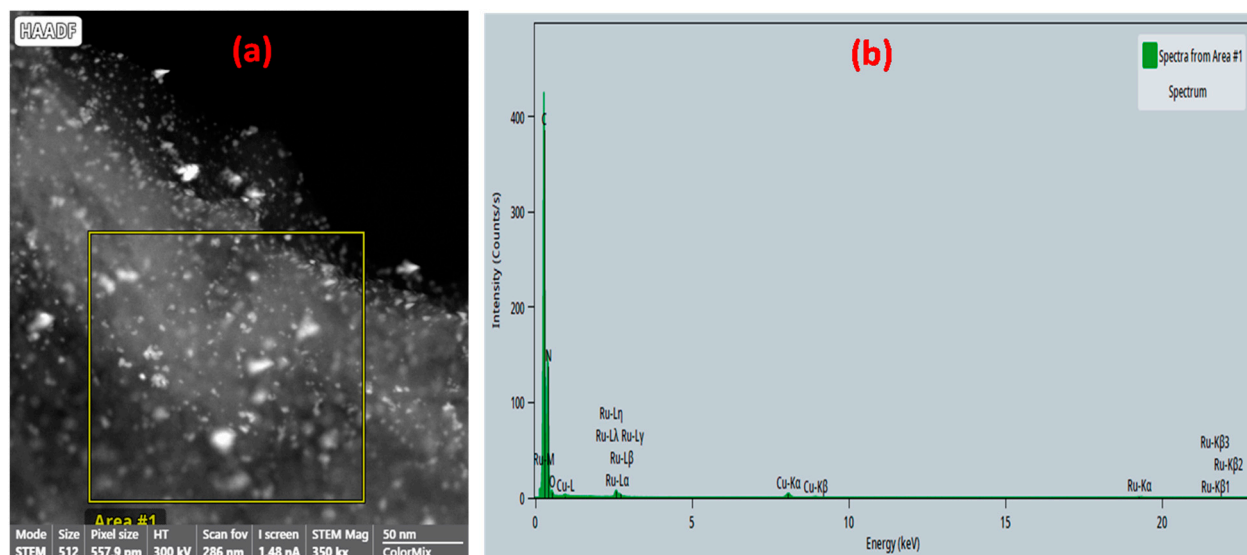

**Figure S4.** TEM image (a) and EDAX (b) of recycled Ru-GCN catalyst.

**Table S4.** Elemental composition of recycled Ru-GCN catalyst.

|    | Weight % | Atomic % | Uncert. % | Detector correction | K factor |
|----|----------|----------|-----------|---------------------|----------|
| C  | 74.16    | 79.14    | 2.05      | 1.00                | 1.00     |
| N  | 21.56    | 19.73    | 1.80      | 1.00                | 0.79     |
| O  | 0.87     | 0.70     | 1.69      | 1.00                | 0.69     |
| Ru | 3.41     | 0.43     | 0.75      | 1.00                | 6.52     |



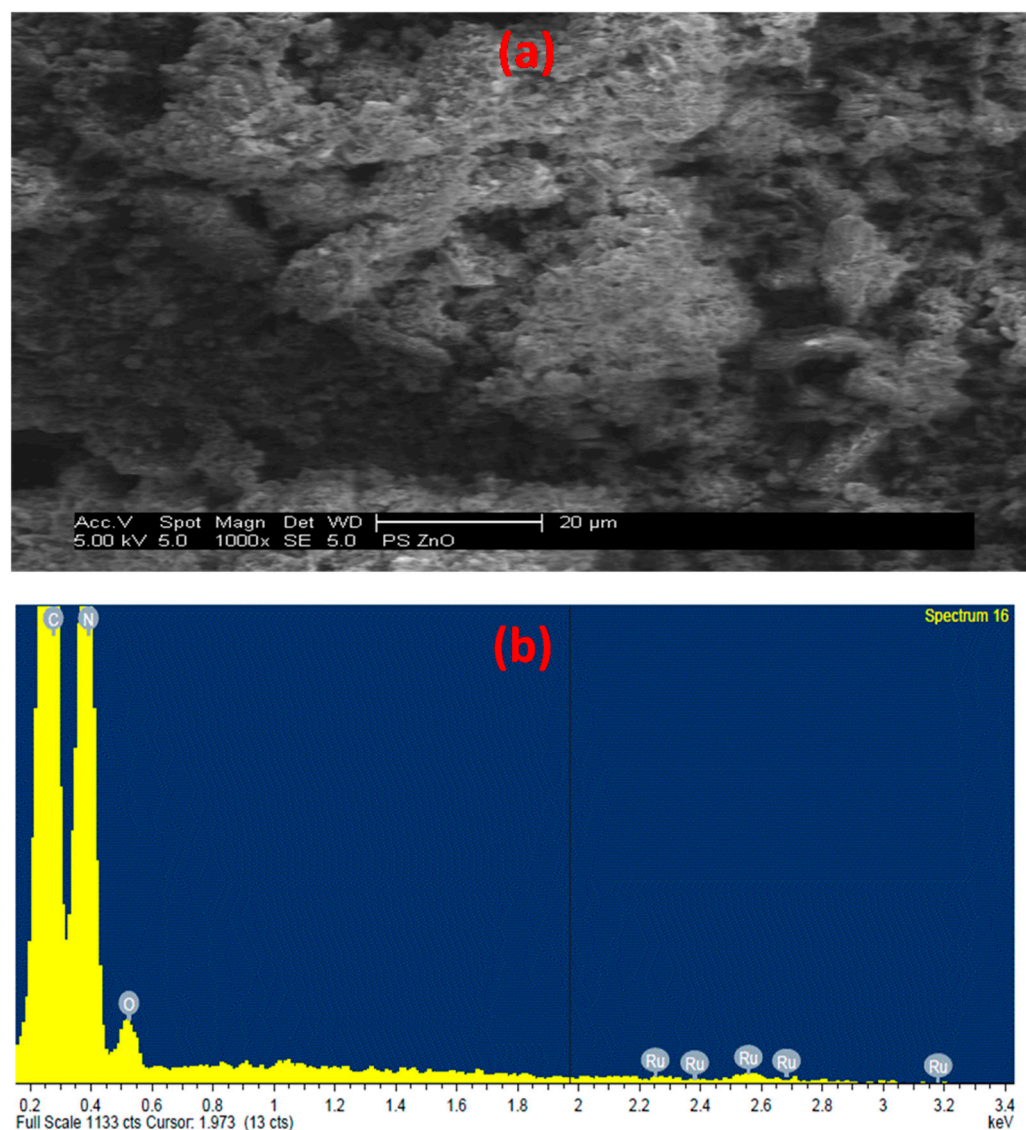

**Figure S5.** SEM image (a) elemental quantification (b) of recycled Ru-GCN catalyst.

**Table S5.** Elemental composition of recycled Ru-GCN catalyst.

| Element | APP Conc. | Intensity Corr. | Weight % | Weight % Sigma | Atomic % |
|---------|-----------|-----------------|----------|----------------|----------|
| C K     | 30.62     | 2.1298          | 32.19    | 0.75           | 35.45    |
| N K     | 18.97     | 0.6687          | 61.8     | 1.05           | 59.98    |
| O K     | 3.03      | 1.4498          | 2.67     | 0.39           | 3.86     |
| Ru L    | 1.41      | 0.5846          | 3.34     | 1.20           | 0.70     |

**Table S6.** XPS Elemental composition/Quantification of recycled Ru-GCN catalyst.

| Element | Atomic conc. [%] | Error [%] | Mass conc. [%] | Error [%] |
|---------|------------------|-----------|----------------|-----------|
| C 1s    | 38,51            | 0,35      | 27,95          | 0,29      |
| N 1s    | 49,38            | 0,35      | 41,79          | 0,31      |
| O 1s    | 8,50             | 0,34      | 8,22           | 0,33      |
| Ru 3d   | 3,61             | 0,05      | 22,04          | 0,26      |

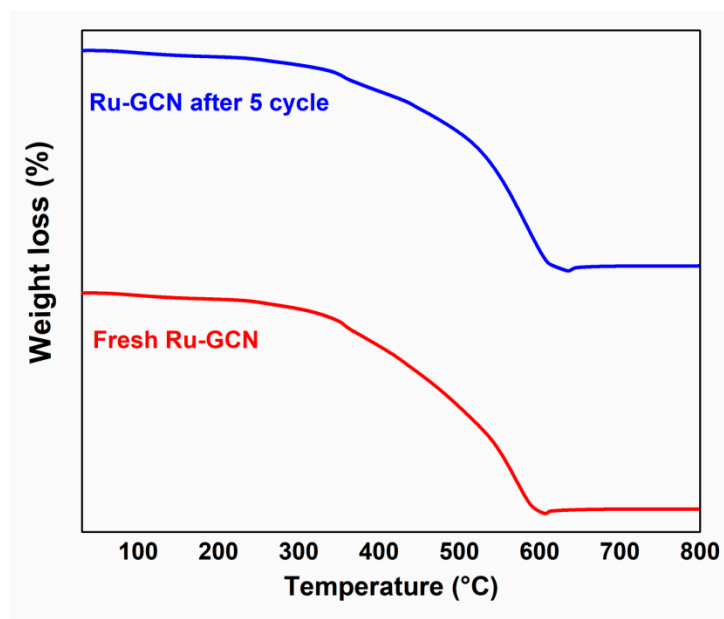

Figure S6. Comparison of TGA of fresh and recycled Ru-GCN catalyst.

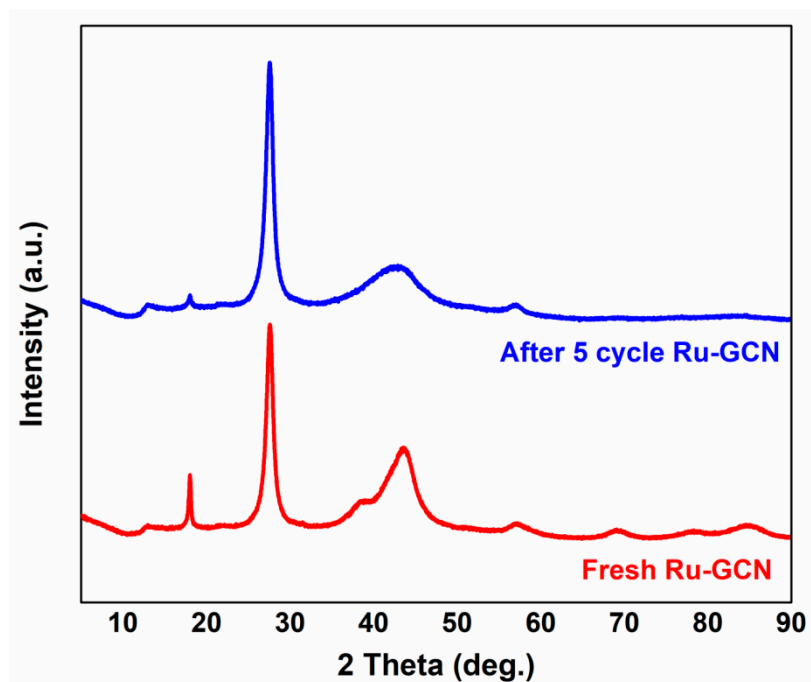

Figure S7. Comparison of XRD of fresh and recycled Ru-GCN catalyst.

#### Experimental Data:

##### 1. Hydrodebenzylation of Benzylbenzoate:

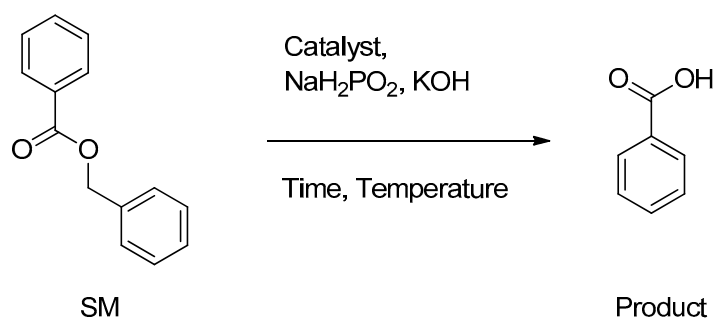

After following the procedure described in the experimental section the isolated product was analyzed by  $^1\text{H}$  NMR.  $^1\text{H}$  NMR (400 MHz, Chloroform- $d$ )  $\delta$ /ppm: 12.65 (s, 1H), 8.19 – 8.16 (m, 2H), 7.68 – 7.63 (m, 1H), 7.54 – 7.49 (m, 2H).

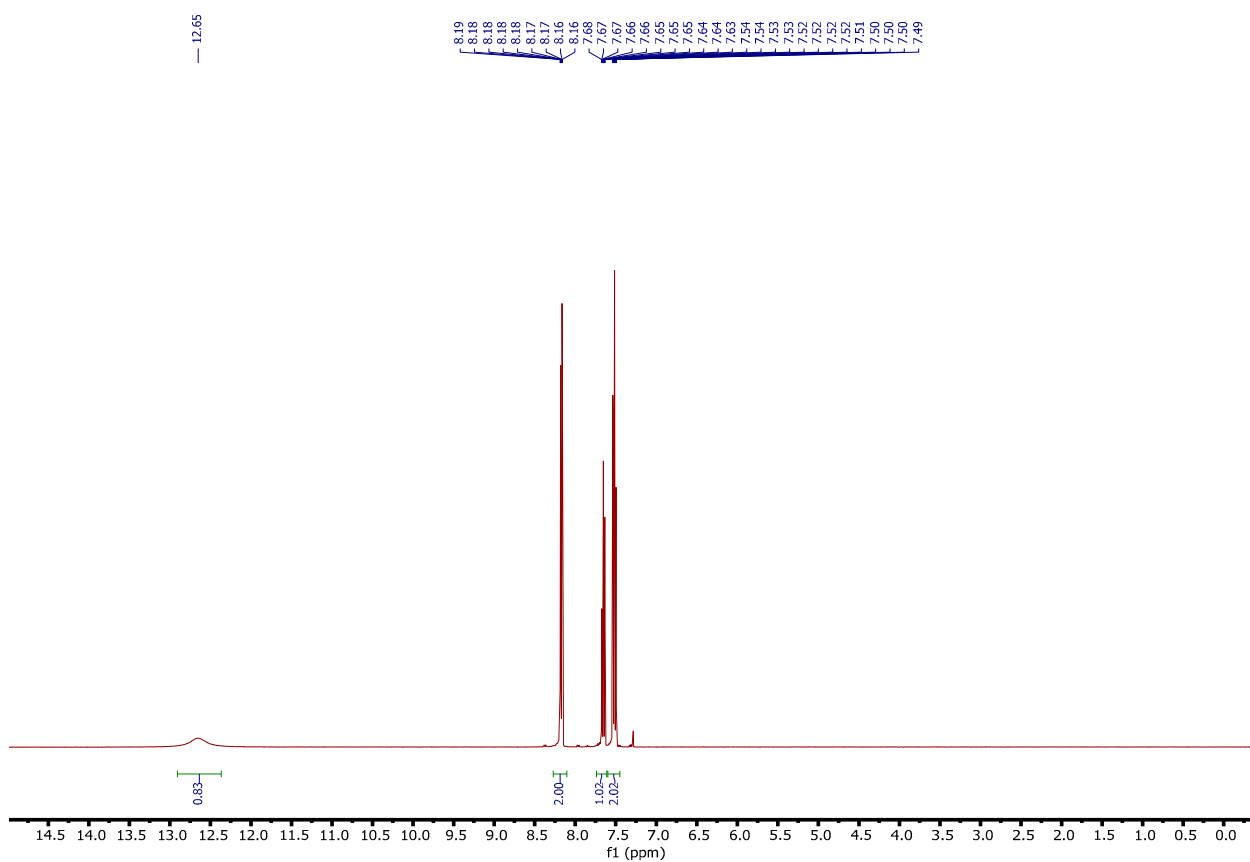

## 2. Hydrodebenzylation of benzyl 2-(3,5-dimethylphenyl)acetate:

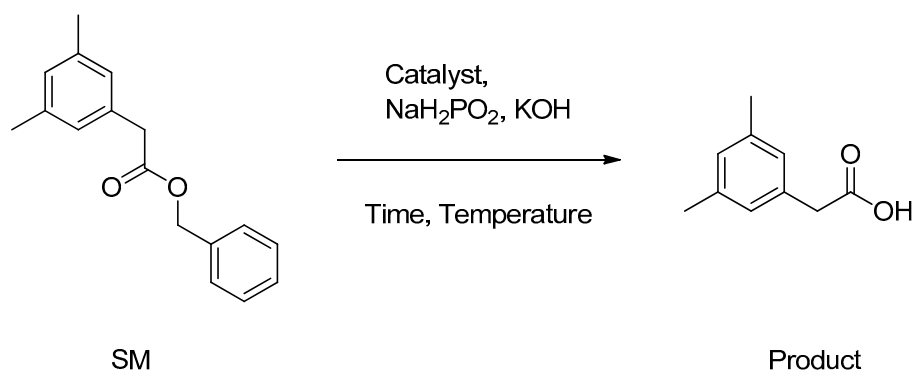

After following the procedure described in the experimental section the isolated product was analyzed by  $^1\text{H}$  NMR.  $^1\text{H}$  NMR (400 MHz, Chloroform- $d$ )  $\delta$ /ppm: 11.81 (s, 1H), 7.77 – 7.77 (m, 2H), 7.28 – 7.27 (m, 1H), 2.41 (s, 6H).

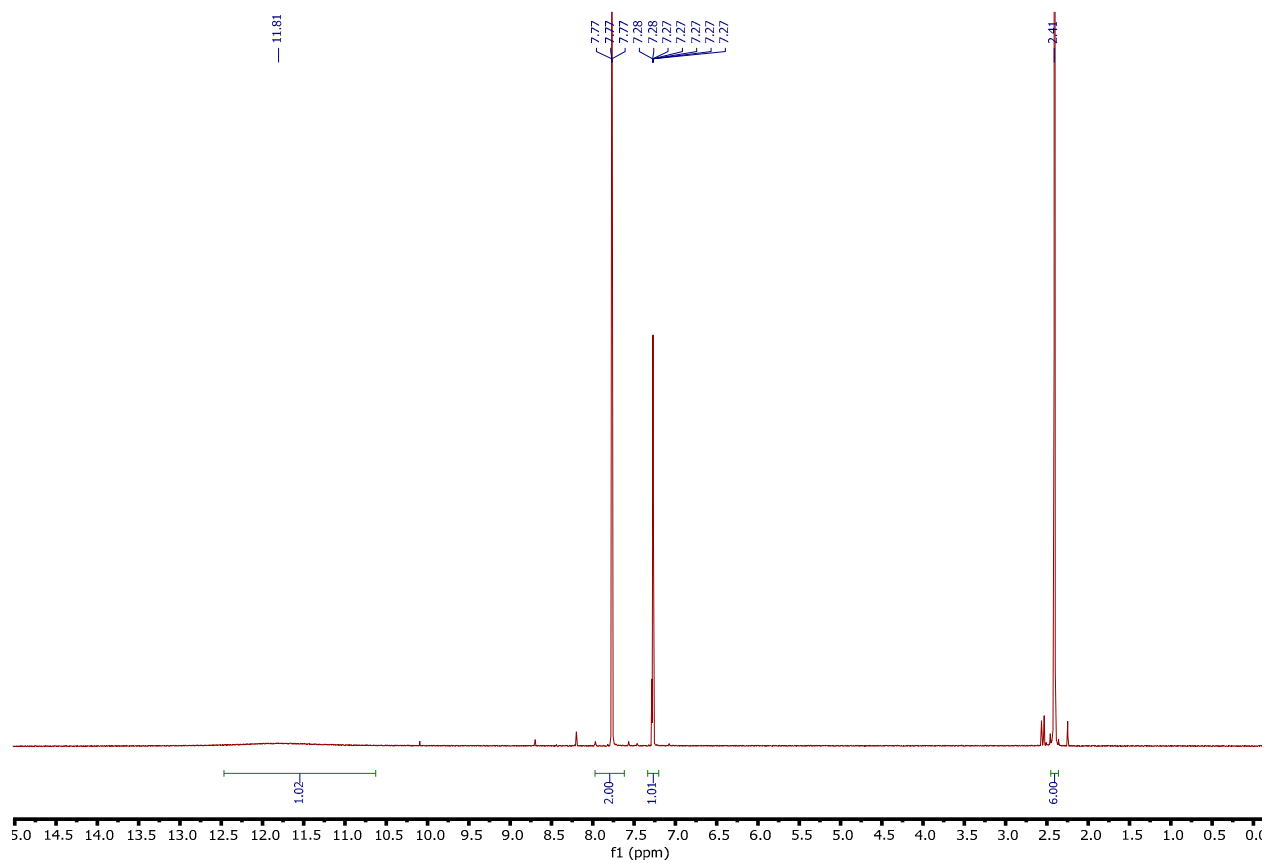

### 3. Hydrodebenzylation of (oxybis(methylene))dibenzene:

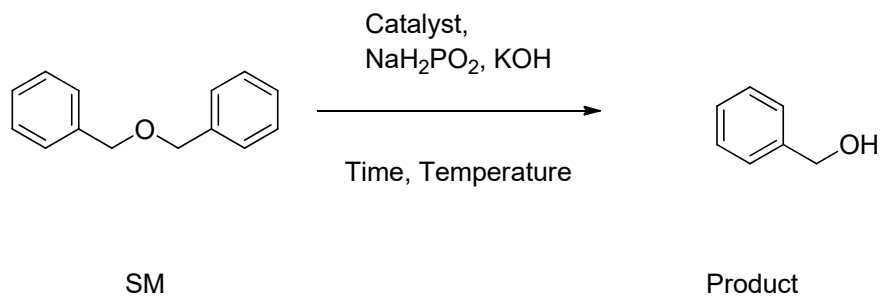

After following the procedure described in the experimental section the isolated product was analyzed by <sup>1</sup>H NMR. <sup>1</sup>H NMR (500 MHz, DMSO-d<sub>6</sub>) δ/ppm: 7.40–7.33 (m, 4H), 7.26–7.23 (m, 1H), 5.26 (d, *J* = 5.5 Hz, 1H), 4.56 (d, *J* = 5.5 Hz, 2H).



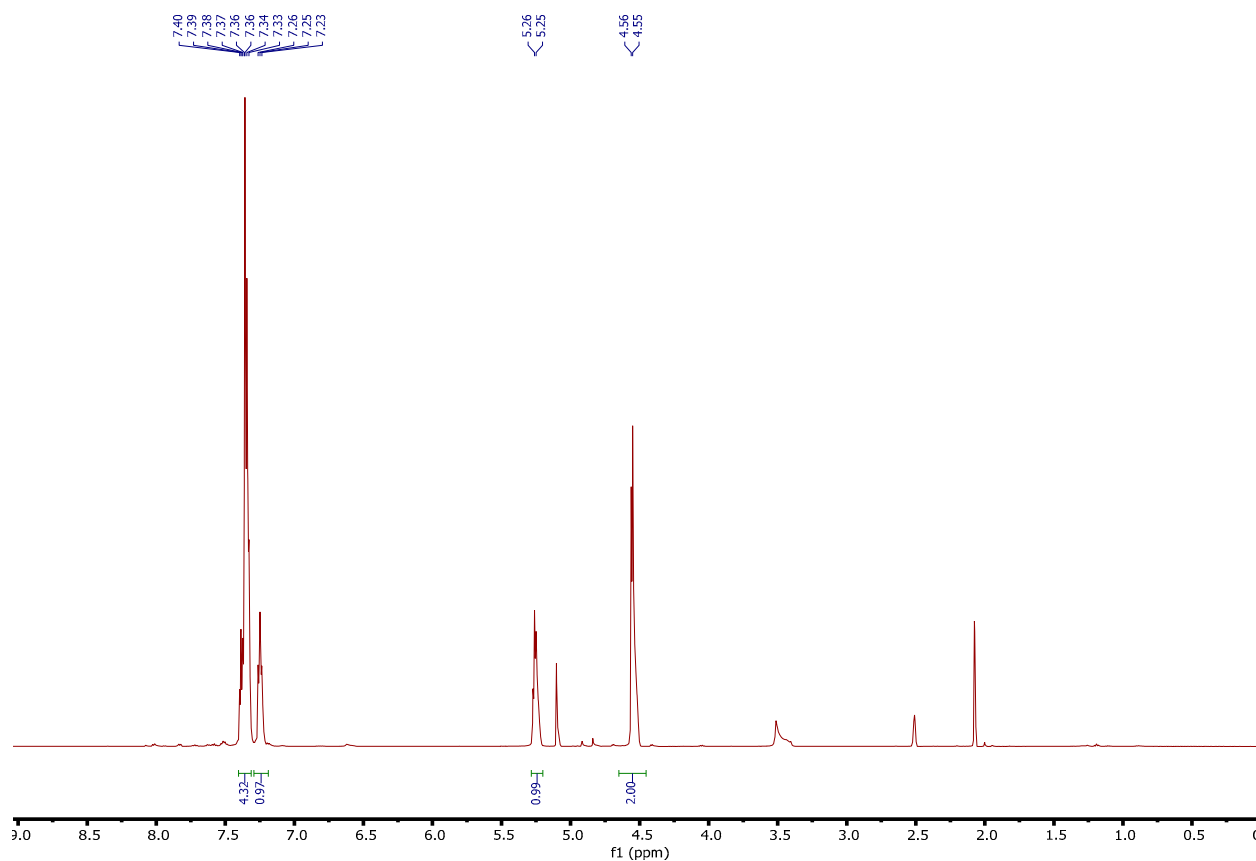

#### 4. Hydrodebenzylation of 1-((benzyloxy)methyl-2-methoxybenzene:

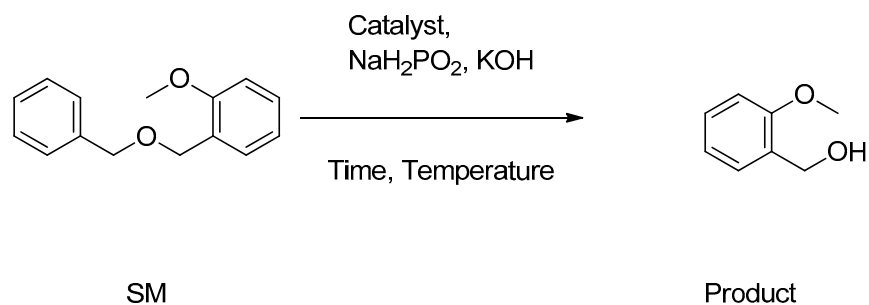

After following the procedure described in the experimental section the isolated product was analyzed by  $^1\text{H}$  NMR.  $^1\text{H}$  NMR (500 MHz, DMSO- $d_6$ )  $\delta$ /ppm: 7.46 (d,  $J = 7.7$  Hz, 1H), 7.26 – 7.23 (m, 1H), 6.99 – 6.93 (m, 2H), 5.06 – 5.04 (m, 1H), 4.59 (d,  $J = 6.8$  Hz, 2H), 3.78 (s, 3H).

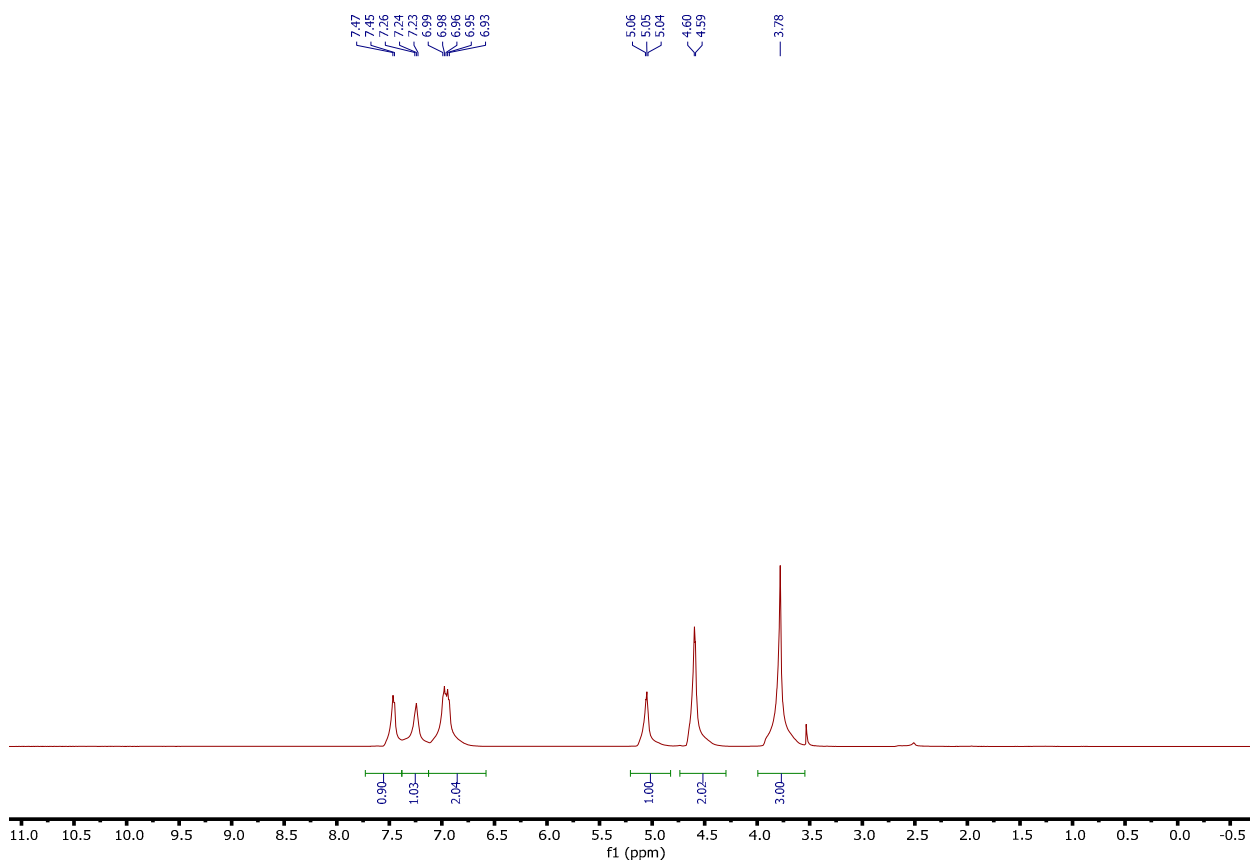

#### 5. Hydrodebzylation of 1-(benzyloxy)-3,5-dimethoxybenzene:

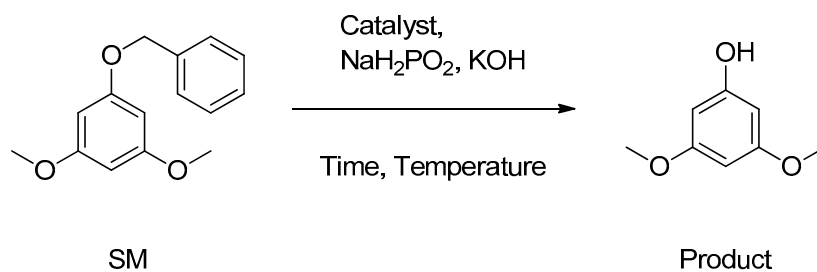

After following the procedure described in the experimental section the isolated product was analyzed by  $^1\text{H}$  NMR.  $^1\text{H}$  NMR (500 MHz,  $\text{DMSO-d}_6$ )  $\delta$ /ppm: 9.40 (s, 1H), 5.97 – 5.95(m, 3H), 3.67 (s, 6H).

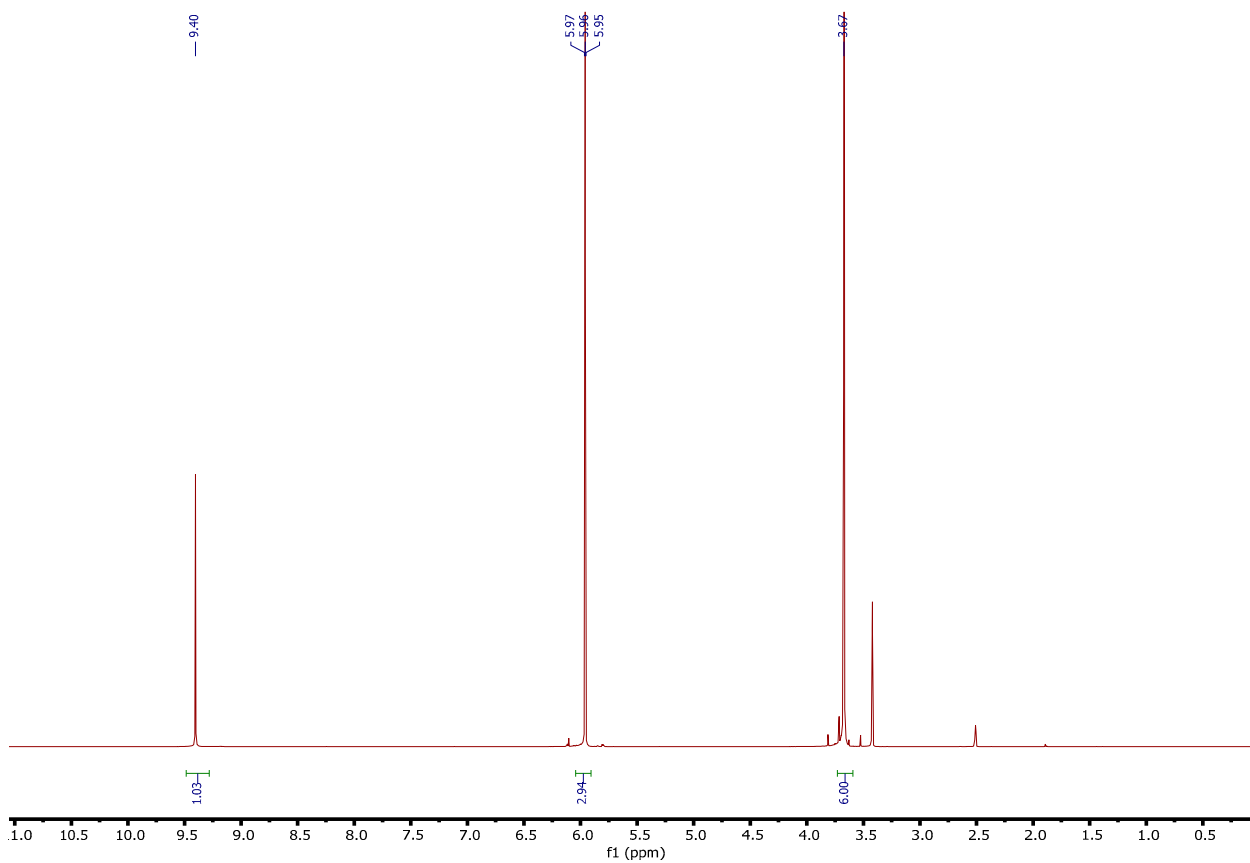

### 6. Hydrodebenzylation of 1-benzyl-4-(benzyloxy)benzene:

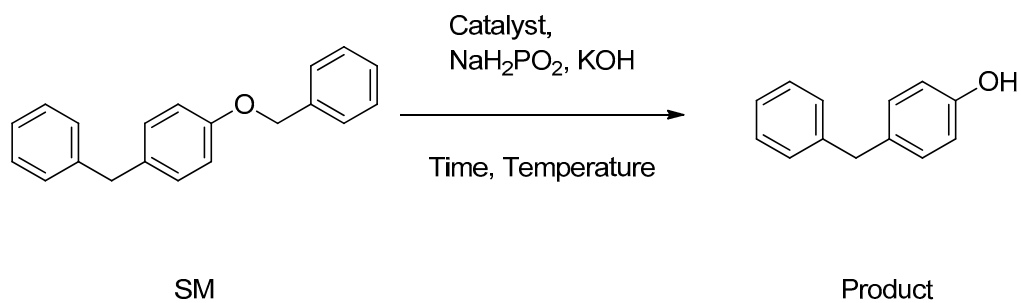

After following the procedure described in the experimental section the isolated product was analyzed by  $^1\text{H}$  NMR.  $^1\text{H}$  NMR (500 MHz,  $\text{DMSO-d}_6$ )  $\delta$ /ppm: 9.19 (s, 1H), 7.29 – 7.25 (m, 2H), 7.20 – 7.15 (m, 3H), 7.03 – 7.0 (m, 2H), 6.70 – 6.67 (m, 2H), 3.82 (s, 2H).

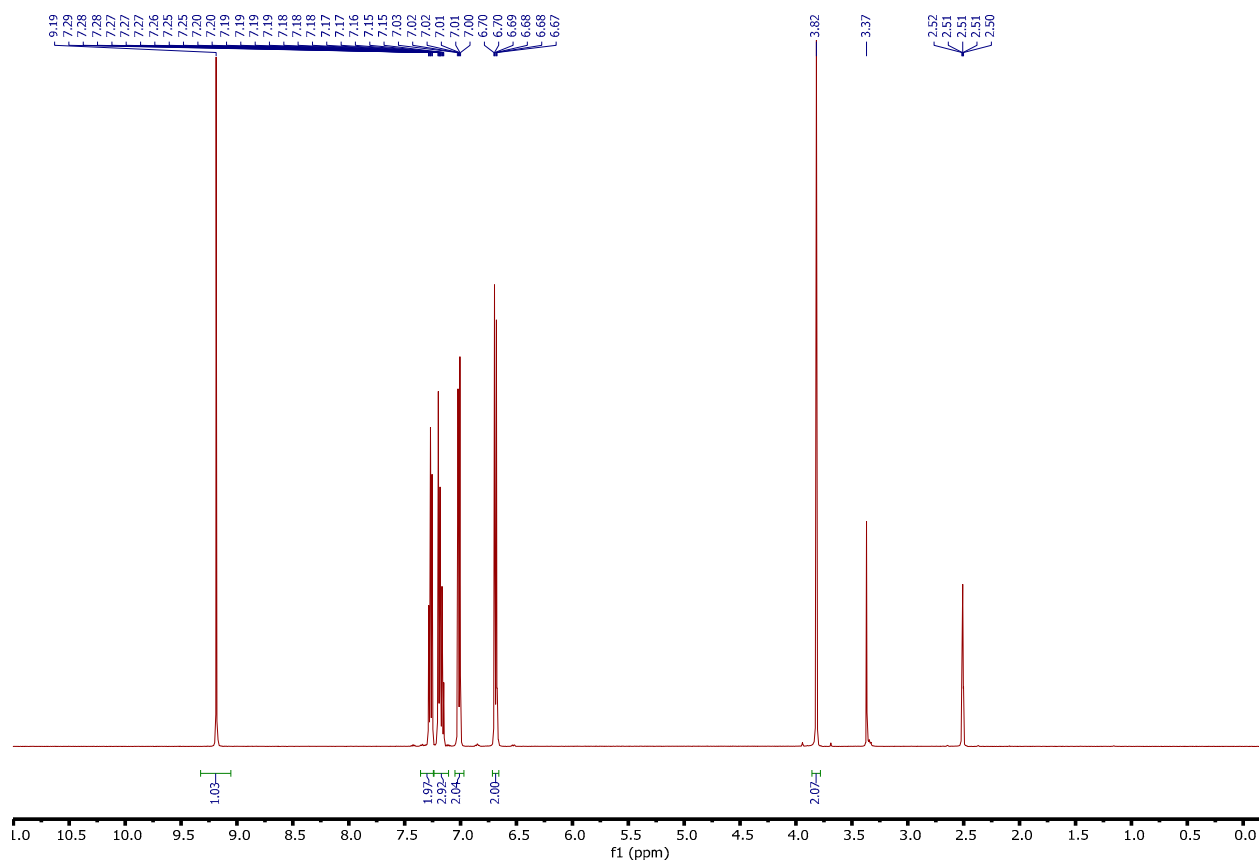

Supplement: s1 [file s1]
